# Supplementary material
Source: ML conference proceedings conference paper supplement (https://openreview.net/forum?id=BKZIivLs9xc)
Supplement: supplementary_material [file attachment]

## Train task

**Pickup Information**  
We'll contact this person in the event of any issues.

Name of person picking tickets up

Email Address

Phone number

**Payment**  
Your payment information is secure.

Google Pay Credit Card

[Add a voucher code](#)

**Confirmation**  
Let's make sure everything looks right.

You're purchasing tickets to The Lion King on Broadway at the Minskoff Theatre in New York, NY.

Wednesday 6 October 7:00 PM 2 Tix Center Orchestra

**Ticket Delivery**  
You'll pick up your tickets from a uniformed TodayTix Concierge agent directly outside the theater. We'll send you detailed information on how to find them. [Learn more about Concierge service](#)

**Amount due**  
Your total is \$259.98. [Show Details](#)

**So you know**  
Tickets to this show are not refundable or exchangeable. This purchase on TodayTix is a concierge service and comes with the TodayTix Buyer Guarantee. As we are not located into a contract with the theater, we get your tickets directly from the box office. In the rare instance that we are not able to get your ticket at the listed price, we will either upgrade you at our expense or contact you to make other arrangements, up to and including a refund. Full details of our guarantee can be found on todaytix.com/terms.

[Agree and Confirm](#)

[Terms of Use](#) [Questions? Contact Us](#)

Full Name **A**

Email

Country +1 Phone

Google Pay Credit Card

**Payment**  
Your payment information is secure.

Google Pay Credit Card

Credit Card Number

Exp Month Exp Year

CVV Billing Zip Code

[Add a voucher code](#)

**Confirmation**  
Let's make sure everything looks right.

You're purchasing tickets to The Lion King on Broadway at the Minskoff Theatre in New York, NY.

Wednesday 6 October 7:00 PM 2 Tix Center Orchestra

**Ticket Delivery**  
You'll pick up your tickets from a uniformed TodayTix Concierge agent directly outside the theater. We'll send you detailed information on how to find them. [Learn more about Concierge service](#)

**Amount due**  
Your total is \$259.98. [Show Details](#)

**So you know**  
Tickets to this show are not refundable or exchangeable. This purchase on TodayTix is a concierge service and comes with the TodayTix Buyer Guarantee. As we are not located into a contract with the theater, we get your tickets directly from the box office. In the rare instance that we are not able to get your ticket at the listed price, we will either upgrade you at our expense or contact you to make other arrangements, up to and including a refund. Full details of our guarantee can be found on todaytix.com/terms.

[Agree and Confirm](#)

[Terms of Use](#) [Questions? Contact Us](#)

Credit Card Number

Exp. Month Exp. Year

CVV Zip

Country

**Agree and Confirm** **C**

**Terms of Use**  
[Questions? Contact Us](#)

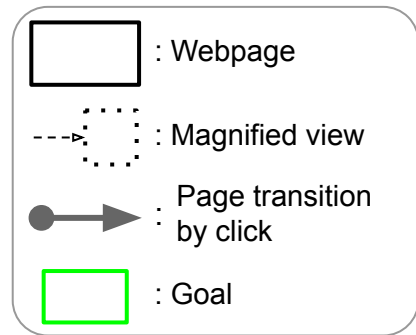

## Test task (Unseen)

☒ **Contact information**

Email

Phone number

**Ship to home**

Ship to home FREE Ship to store FREE

**Shipping information**

First name

Last name

Address

City

State

ZIP Code

☐ Send this order as a gift

**Order summary**

Items: Shipping: Sales Tax:

[Continue to Payment](#)

Contact information **A**

Email

Phone

First Name

Last Name

[More options](#)

**Product ship method** **B**

☐ Standard - FREE  
Arrives in 3-5 business days.†

☒ Standard - FREE  
Arrives in 3-5 business days.†

☐ Expedited - \$8.99  
Arrives in 2 business days guaranteed

[Cancel](#) [Save changes](#)

☒ **Contact information**

Email

Phone number

**Ship to Home**

Ship to home FREE Ship to store FREE

**Shipping information**

First name

Last name

Address

City

State

ZIP Code

☐ Send this order as a gift

**Order summary**

Items: Shipping: Sales Tax:

[Continue to Payment](#)

**Terms of use.** **C**

[Submit Order](#)

[Need Help? Live Chat](#)
